# Supplementary material for: Virtual Screening of FDA-Approved Drugs against Triose Phosphate Isomerase from Entamoeba histolytica and Giardia lamblia Identifies Inhibitors of Their Trophozoite Growth Phase
Source: MDPI journal article supplement (doi:10.3390/ijms22115943), 2021-05-31
Supplement: s1 [file s1]

**Table S1.** Top ten FDA drugs from virtual screening on active site of TIMEh.

| Compound                | Structure                                                                           | Docking score (Kcal/mol) | Description                                                           |
|-------------------------|-------------------------------------------------------------------------------------|--------------------------|-----------------------------------------------------------------------|
| Risperidone             | 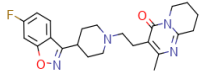   | -7.5                     | Antipsychotic.                                                        |
| Pemetrexed              |    | -7.0                     | Chemotherapy.                                                         |
| Folic Acid              |    | -6.9                     | Supplementation agent.                                                |
| Chlorhexidine           |    | -6.8                     | Broad-spectrum antimicrobial.                                         |
| Isocarboxazid           |    | -6.8                     | Treatment of major depression.                                        |
| Rilpivirine             |    | -6.8                     | Treatment of HIV-1 infections.                                        |
| Iloperidone             |   | -6.7                     | Antipsychotic.                                                        |
| Pralatrexate            |  | -6.7                     | Treatment of relapsed or refractory peripheral T-cell lymphoma.       |
| Glycerol phenylbutyrate |  | -6.7                     | Therapy for chronic management of patients with urea cycle disorders. |
| Bisacodyl               |  | -6.7                     | Prescribed for constipation and neurogenic bowel dysfunction.         |

**Table S2.** Interaction profile of top ten compound from virtual screening on TIMEh.

| Compound    | Interactions          |                       |                       |
|-------------|-----------------------|-----------------------|-----------------------|
| Risperidone | 1 x hphobic Trp75(B)  | 1 x hphobic His110(B) | 1 x hbond Gln115(B)   |
|             | 1 x hphobic Ile108(A) | 2 x hphobic Gln115(B) | 1 x pistack His110(A) |
| Pemetrexed  | 1 x hphobic Trp75(A)  | 1 x hbond Lys77(B)    | 1 x hbond Lys119(B)   |
|             | 1 x hphobic Ile108(B) | 1 x hbond His110(B)   | 1 x sbridge His110(B) |
|             | 2 x hphobic Phe109(A) | 1 x hbond Glu111(B)   | 1 x sbridge Lys119(A) |

|               |                       |                       |                       |
|---------------|-----------------------|-----------------------|-----------------------|
|               | 1 x hphobic Phe109(B) | 1 x hbond Gln115(A)   | 2 x pistack Trp75(B)  |
|               | 1 x hphobic His110(B) | 2 x hbond Gln115(B)   |                       |
| Folic Acid    | 1 x hphobic Phe109(B) | 1 x hbond Phe109(B)   | 2 x hbond Gln115(B)   |
|               | 1 x hphobic His110(A) | 1 x hbond His110(A)   | 1 x sbridge His110(B) |
|               | 1 x hbond Lys77(B)    | 1 x hbond His110(B)   | 1 x pistack Trp75(B)  |
|               | 1 x hbond Ile108(B)   | 1 x hbond Gln115(A)   |                       |
| Chlorhexidine | 1 x hphobic Tyr81(A)  | 2 x hphobic Gln115(B) | 1 x hbond Gln115(A)   |
|               | 1 x hphobic Ile108(B) | 1 x hbond Ile108(A)   | 1 x hbond Gln115(B)   |
|               | 1 x hphobic Phe109(B) | 1 x hbond His110(B)   | 1 x pistack Trp75(B)  |
|               | 1 x hphobic His110(A) |                       |                       |
| Isocarboxazid | 1 x hphobic Trp75(B)  | 1 x hbond Lys77(B)    | 2 x hbond Gln115(B)   |
|               | 1 x hphobic His110(B) | 1 x hbond Phe109(B)   | 1 x pistack His110(A) |
|               | 1 x hphobic Lys119(B) |                       |                       |
| Rilpivirine   | 1 x hphobic Ile108(A) | 1 x hphobic His110(B) | 2 x hbond Gln115(B)   |
|               | 2 x hphobic Phe109(A) | 1 x hbond Ile108(B)   | 1 x pistack His110(A) |
| Iloperidone   | 1 x hphobic Trp75(B)  | 1 x hphobic His110(B) | 1 x hbond Gln115(B)   |
|               | 1 x hphobic Ile108(A) | 2 x hphobic Gln115(B) | 1 x hbond Lys119(B)   |
|               | 2 x hphobic Phe109(A) | 1 x hphobic Lys119(B) |                       |
| Pralatrexate  | 1 x hphobic Trp75(B)  | 1 x hphobic Gln115(B) | 1 x hbond Gln115(B)   |
|               | 1 x hphobic Phe109(A) | 1 x hbond His110(A)   | 1 x sbridge His110(B) |
|               | 1 x hphobic His110(B) | 1 x hbond Glu111(A)   | 1 x sbridge Lys119(A) |
|               | 1 x hphobic Glu111(B) | 1 x hbond Gln115(A)   |                       |

|                |                                                                                                 |                                                                                                |                                                                                               |
|----------------|-------------------------------------------------------------------------------------------------|------------------------------------------------------------------------------------------------|-----------------------------------------------------------------------------------------------|
| Glycerol       | 2 x hphobic Trp75(B)<br>1 x hphobic Tyr81(B)                                                    | 1 x hphobic Phe109(A)<br>1 x hphobic His110(B)                                                 | 2 x sbridge His110(A)<br>1 x sbridge His110(B)                                                |
| phenylbutyrate | 1 x hphobic Arg106(B)<br>3 x hphobic Ile108(A)                                                  | 1 x hphobic Glu111(B)<br>1 x hphobic Gln115(B)                                                 | 1 x pistack Trp75(B)                                                                          |
| Bisacodyl      | 1 x hphobic Trp75(B)<br>1 x hphobic Phe109(A)<br>2 x hphobic Phe109(B)<br>1 x hphobic His110(B) | 1 x hphobic Glu111(B)<br>1 x hphobic Gln115(B)<br>1 x hphobic Lys119(B)<br>1 x hbond Gln115(A) | 1 x hbond Gln115(B)<br>1 x sbridge Lys77(B)<br>1 x sbridge His110(B)<br>1 x sbridge Lys119(B) |

**Table S3.** Top ten compound from virtual screening on TIMGL.

| Compound      | Structure                                                                           | Docking score (Kcal/mol) | Description                                                                            |
|---------------|-------------------------------------------------------------------------------------|--------------------------|----------------------------------------------------------------------------------------|
| Levocabastine | 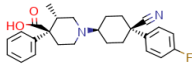   | -9.5                     | Used for allergic conjunctivitis.                                                      |
| Etoposide     |    | -9.4                     | Antitumor activity.                                                                    |
| Sulfasalazine |   | -9.3                     | Management of inflammatory bowel diseases.                                             |
| Eltrombopag   |  | -9.3                     | Treatment of low blood platelet counts in adults with chronic immune thrombocytopenia. |
| Indinavir     |  | -9.2                     | Treatment of HIV-1 infections.                                                         |
| Difenoxin     |  | -9.0                     | Treatment of diarrhea.                                                                 |
| Dolasetron    |  | -8.9                     | Antinauseant and antiemetic agent.                                                     |
| Bosentan      |  | -8.7                     | Treatment of pulmonary hypertension.                                                   |
| Carvedilol    |  | -8.7                     | Treatment of heart failure and hypertension.                                           |

Lapatinib

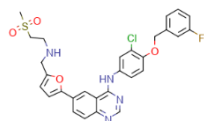

-8.7

Chemotherapy agent.

**Table S4.** Interaction profile of top ten compound from virtual screening on TIMGL.

| Compound      |                       | Interactions          |                        |
|---------------|-----------------------|-----------------------|------------------------|
| Levocabastine | 1 x hphobic Tyr68(A)  | 1 x hphobic Gln109(A) | 1 x hbond Lys113(B)    |
|               | 1 x hphobic Tyr68(B)  | 1 x hphobic Gln109(B) | 1 x sbridge Arg99(A)   |
|               | 1 x hphobic Leu69(A)  | 1 x hbond Glu105(B)   | 1 x sbridge Lys113(A)  |
|               | 1 x hphobic Leu69(B)  |                       |                        |
| Etoposide     | 1 x hphobic Tyr68(A)  |                       | 1 x hbond Gln109(B)    |
|               | 1 x hphobic Leu69(A)  | 1 x hbond Glu78(B)    | 1 x hbond Lys113(A)    |
|               | 1 x hphobic Gln109(A) | 1 x hbond Arg99(A)    | 1 x sbridge Arg99(B)   |
|               | 1 x hbond Tyr68(A)    | 1 x hbond Arg99(B)    | 1 x sbridge Lys113(A)  |
|               | 1 x hbond Tyr68(B)    | 1 x hbond Ile102(A)   | 1 x sbridge Lys113(B)  |
| Sulfasalazine | 1 x hphobic Tyr68(A)  | 1 x hphobic Gln109(A) | 1 x hbond Arg99(B)     |
|               | 2 x hphobic Leu69(A)  | 1 x hbond Tyr68(A)    | 1 x hbond Met103(A)    |
|               | 1 x hphobic Met103(B) | 1 x hbond Glu70(A)    | 1 x pication Arg99(B)  |
|               | 1 x hphobic Glu105(B) | 1 x hbond Arg99(A)    |                        |
| Eltrombopag   | 1 x hphobic Tyr68(A)  | 1 x hphobic Glu105(B) | 1 x hbond Glu78(B)     |
|               | 1 x hphobic Leu69(A)  | 1 x hphobic Gln109(A) | 1 x hbond Arg99(B)     |
|               | 2 x hphobic Leu69(B)  | 1 x hphobic Gln109(B) | 1 x hbond Gln109(A)    |
|               | 1 x hphobic Met103(A) | 1 x hbond Tyr68(A)    | 1 x pistack Tyr68(B)   |
|               | 1 x hphobic Glu105(A) | 1 x hbond Glu78(A)    | 1 x pication Lys113(B) |
| Indinavir     | 1 x hphobic Tyr68(B)  | 1 x hphobic Glu105(B) | 1 x hbond Met103(A)    |
|               | 1 x hphobic Met103(B) | 1 x hbond Tyr68(B)    | 1 x hbond Gln109(A)    |
|               | 1 x hphobic Glu105(A) | 1 x hbond Arg99(A)    | 2 x hbond Gln109(B)    |
| Difenoxin     | 1 x hphobic Tyr68(A)  | 1 x hphobic Gln109(B) | 1 x sbridge Glu78(B)   |
|               | 1 x hphobic Leu69(A)  | 1 x hbond Arg99(B)    | 1 x sbridge Arg99(B)   |
|               | 1 x hphobic Leu69(B)  | 1 x hbond Met103(B)   | 1 x sbridge Lys113(B)  |
|               | 1 x hphobic Glu105(A) | 1 x hbond Glu105(B)   | 1 x pistack Tyr68(B)   |
|               | 2 x hphobic Gln109(A) |                       |                        |
| Dolasetron    | 1 x hphobic Tyr68(A)  | 2 x hphobic Glu105(B) | 1 x sbridge Arg99(A)   |
|               | 1 x hphobic Tyr68(B)  | 1 x hbond Tyr68(A)    | 1 x sbridge Arg99(B)   |
|               | 1 x hphobic Glu105(A) | 1 x hbond Arg99(B)    |                        |
| Bosentan      | 1 x hbond Glu78(B)    | 1 x hbond Met103(B)   | 1 x hbond Lys113(B)    |
|               | 2 x hbond Arg99(A)    | 1 x hbond Glu105(B)   | 1 x pistack Tyr68(A)   |

|            |                                                                                              |                                                                     |                                                                     |
|------------|----------------------------------------------------------------------------------------------|---------------------------------------------------------------------|---------------------------------------------------------------------|
|            | 1 x hbond Arg99(B)                                                                           | 1 x hbond Gln109(A)                                                 |                                                                     |
| Carvedilol | 1 x hphobic Tyr68(A)<br>1 x hphobic Met103(A)<br>1 x hphobic Glu105(B)<br>1 x hbond Glu78(A) | 1 x hbond Arg99(A)<br>1 x hbond Arg99(B)<br>1 x hbond Gly104(A)     | 2 x hbond Gln109(A)<br>1 x hbond Gln109(B)<br>1 x pication Arg99(A) |
| Lapatinib  | 1 x hphobic Tyr68(A)<br>1 x hphobic Tyr68(B)<br>1 x hphobic Leu69(A)                         | 1 x hphobic Leu69(B)<br>1 x hphobic Glu105(B)<br>2 x hbond Arg99(B) | 1 x hbond Met103(A)<br>1 x hbond Glu105(B)<br>1 x hbond Lys113(B)   |

**Table S5.** Top ten compounds selected from virtual screening against both *TIMEh* and *TIMGL*.

| Compound      | Structure                                                                           | Docking score (Kcal/mol)                                    | Description                        |
|---------------|-------------------------------------------------------------------------------------|-------------------------------------------------------------|------------------------------------|
| Clorhexidine  | 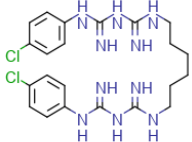   | -6.8 <sup>1</sup><br>-8.3 <sup>2</sup><br>-7.6 <sup>3</sup> | Broad-spectrum antimicrobial.      |
| Pemetrexed    |  | -7.0<br>-8.0<br>-7.5                                        | Chemotherapy.                      |
| Dolasetron    |  | -6.0<br>-8.9<br>-7.5                                        | Antinauseant and antiemetic agent. |
| Tolcapone     |  | -6.3<br>-8.5<br>-7.4                                        | Treatment of Parkinson's disease.  |
| Imatinib      |  | -6.7<br>-8.1<br>-7.4                                        | Chemotherapy.                      |
| Arbutamine    |  | -6.4<br>-8.3<br>-7.4                                        | Cardiac stimulant.                 |
| Folic acid    |  | -6.6<br>-7.9<br>-7.3                                        | Supplementation agent.             |
| Isocarboxazid |                                                                                     | -6.8                                                        | Treatment of major depression.     |

|                         |                                                                                   |      |                                                                       |
|-------------------------|-----------------------------------------------------------------------------------|------|-----------------------------------------------------------------------|
|                         | 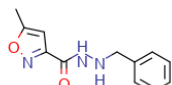 | -7.5 |                                                                       |
|                         |                                                                                   | -7.2 |                                                                       |
| Glycerol phenylbutyrate |  | -6.9 | Therapy for chronic management of patients with urea cycle disorders. |
|                         |                                                                                   | -7.5 |                                                                       |
|                         |                                                                                   | -7.2 |                                                                       |
| Phenindione             |  | -6.5 | Anticoagulant.                                                        |
|                         |                                                                                   | -7.7 |                                                                       |
|                         |                                                                                   | -7.1 |                                                                       |

<sup>1</sup> TIME<sub>h</sub> value<sup>2</sup> TIMGI value<sup>3</sup> Mean value**Table S6.** ADMET characteristics of selected compounds. Available at: <https://go.drugbank.com/>

| Compound      | Absorption                                                                                                             | Mechanism of action                                                                                         | Metabolism                                                                                                      | Route of elimination                                                                                 | Toxicity                                                                                                                                                             |
|---------------|------------------------------------------------------------------------------------------------------------------------|-------------------------------------------------------------------------------------------------------------|-----------------------------------------------------------------------------------------------------------------|------------------------------------------------------------------------------------------------------|----------------------------------------------------------------------------------------------------------------------------------------------------------------------|
| Chlorhexidine | Orally administered chlorhexidine is very poorly absorbed from the gastrointestinal.                                   | Disrupt microbial cell membranes.                                                                           | Unlikely to undergo metabolic conversion to any significant extent.                                             | Exclusively via the feces.                                                                           | The LD50 of subcutaneously administered chlorhexidine in mice is >5 g/kg.                                                                                            |
| Imatinib      | Well absorbed with mean absolute bioavailability is 98% and maximum plasma levels achieved within 2-4 hours of dosing. | Inhibits the Bcr-Abl tyrosine kinase.                                                                       | Primarily hepatic via CYP3A4.                                                                                   | 81% of the dose is eliminated within 7 days, 68% in feces and 13% urine.                             | The most frequently reported adverse reactions (>30%) were edema, nausea, vomiting, muscle cramps, musculoskeletal pain, diarrhea, rash, fatigue and abdominal pain. |
| Folic acid    | Rapidly absorbed from the small intestine, primarily from the proximal portion.                                        | Folic acid congeners are transported across cells by receptor-mediated endocytosis where they are needed to | Folic acid is metabolized in the liver into the cofactors dihydrofolate (DHF) and tetrahydrofolate (THF) by the | After a single oral dose of 100 mcg of folic acid in a limited number of normal adults, only a trace | IPR-MUS LD50 85 mg/kg<br>IVN-GPG LD50 120 mg/kg<br>IVN-MUS LD50 239 mg/kg<br>IVN-RAT LD50 500 mg/kg                                                                  |

|           |                                                          |                                                                                                                                                          |                                                            |                                                                                                                          |                                    |
|-----------|----------------------------------------------------------|----------------------------------------------------------------------------------------------------------------------------------------------------------|------------------------------------------------------------|--------------------------------------------------------------------------------------------------------------------------|------------------------------------|
|           |                                                          | maintain normal erythropoiesis, synthesize purine and thymidylate nucleic acids, interconvert amino acids, methylate tRNA, and generate and use formate. | enzyme dihydrofolate reductase (DHFR).                     | amount of the drug appeared in the urine.                                                                                | IVN-RBT LD50 410 mg/kg             |
| Tolcapone | Rapidly absorbed (absolute bioavailability is about 65%) | The precise mechanism of action of tolcapone is unknown, but it is believed to be related to its ability to inhibit COMT                                 | The main metabolic pathway of tolcapone is glucuronidation | Almost completely metabolized prior to excretion, with only a very small amount (0.5% of dose) found unchanged in urine. | LD50 = 1600 mg/kg (Orally in rats) |

```

import concurrent.futures
import os
import time
import glob
import sys

molecules_path = sys.argv[1]
list_of_molecules = glob.glob('%s/*'%molecules_path)
config_file = sys.argv[2]

start = time.perf_counter()

def runVina(mol):
    print('Running %s...' % mol)
    out = mol.replace('ligands', 'out_vina')
    os.system('./vina --ligand %s --config %s --out %s' % (mol, config_file, out))

with concurrent.futures.ProcessPoolExecutor() as executor:
    results = [executor.submit(runVina, mol) for mol in list_of_molecules]

    for f in concurrent.futures.as_completed(results):
        print('Done...')
finish = time.perf_counter()
print('Finished in %f seconds' % (finish-start))

```

**Figure S1.** Python script for docking automatization
